# Supplementary material
Source: PubMed Central journal article supplement (PMC5455055)
Supplement: NIHMS857009-supplement-Supplemental_Figures.pdf [file NIHMS857009-supplement-Supplemental_Figures.pdf]

Supplementary Materials for  
**Cytokinesis involves a nontranscriptional function of the Hippo  
pathway effector YAP**

Duyen Amy Bui, Wendy Lee, Anne E. White, J. Wade Harper, Ron C. J. Schackmann,  
Michael Overholtzer, Laura M. Selfors, Joan S. Brugge\*

\*Corresponding author. E-mail: joan\_brugge@hms.harvard.edu

Published 1 March 2016, *Sci. Signal.* **9**, ra23 (2016)  
DOI: 10.1126/scisignal.aaa9227

**This PDF file includes:**

Fig. S1. Immunofluorescence analysis of YAP-depleted cells.  
Fig. S2. YAP hairpins.  
Fig. S3. Spindle misorientation after YAP knockdown.  
Fig. S4. YAP phospho-mutant combinations.  
Fig. S5. Phosphorylation of MLC is increased by expression of the YAP 3A mutant.  
Fig. S6. YAP and PATJ coimmunoprecipitation.  
Fig. S7. Immunofluorescence of PATJ-depleted cells.  
Legend for table S1  
Legends for movies S1 to S10

**Other Supplementary Material for this manuscript includes the following:**  
(available at [www.sciencesignaling.org/cgi/content/full/9/417/ra23/DC1](http://www.sciencesignaling.org/cgi/content/full/9/417/ra23/DC1))

Table S1 (Microsoft Excel format). HCIPs for YAP wild type, YAP 3D, and YAP 3A.  
Movie S1 (.mov format). Mitosis of MCF-10A cells depleted of YAP with five distinct shRNA sequences.  
Movie S2 (.mov format). Mitosis of YAP-depleted MCF-10A cells expressing GFP-tubulin.  
Movie S3 (.mov format). Mitosis of MCF-10A cells treated with YAP siRNA.  
Movie S4 (.mov format). Mitosis of YAP-depleted MCF-10A cells in a monolayer.  
Movie S5 (.mov format). Mitosis of YAP-depleted HeLa cells.  
Movie S6 (.mov format). Mitosis of YAP-depleted multiple HeLa cells.

Movie S7 (.mov format). RHOA localization in a mitotic YAP-depleted MCF-10A cell.

Movie S8 (.mov format). Mitosis of YAP-depleted MCF-10A cells treated with C3 transferase or Y-27632.

Movie S9 (.mov format). Mitosis of MCF-10A cells expressing wild-type YAP or YAP 3A or YAP 3D mutants.

Movie S10 (.mov format). Mitosis of PATJ-depleted MCF-10A cells.

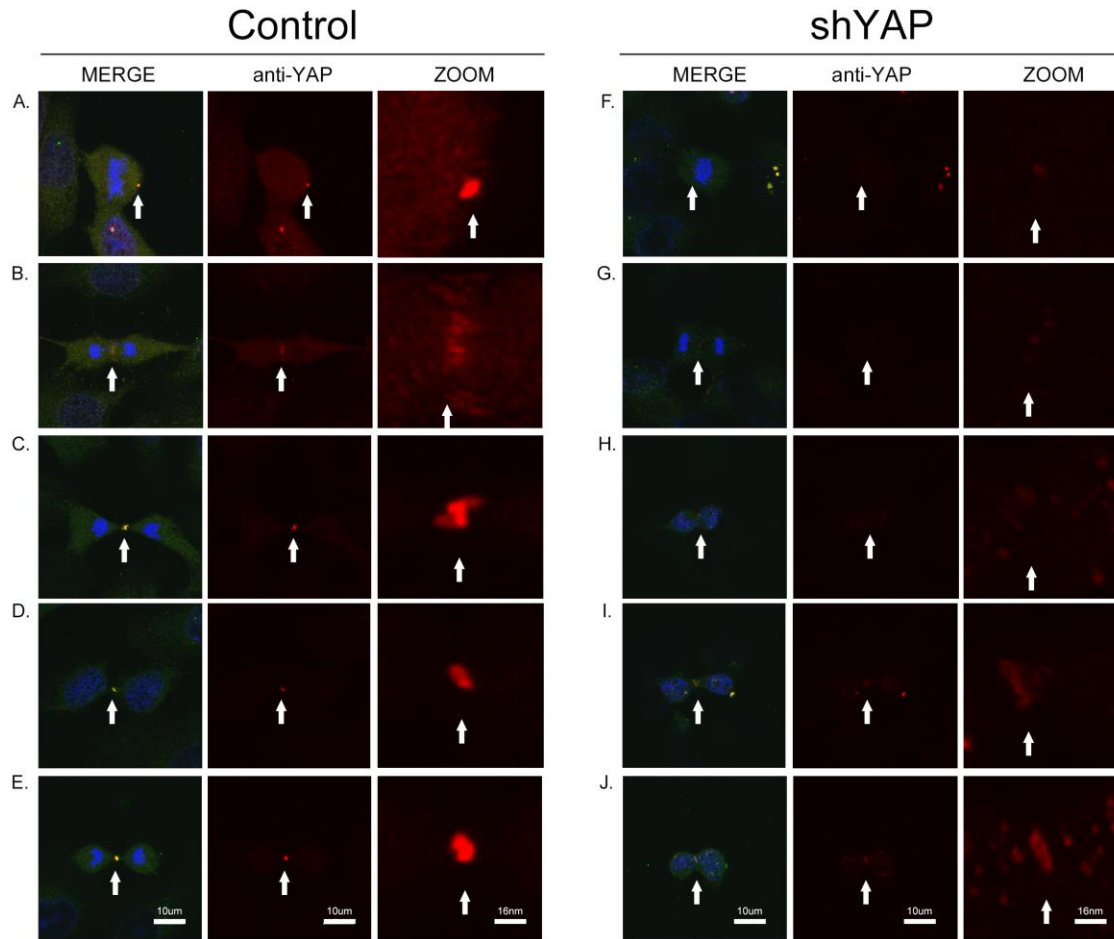

**Fig. S1**

**Immunofluorescence analysis of YAP-depleted cells**

Representative images showing localization of YAP (red) and Dapi (blue) for control LKO (**A-E**) or shYAP (**F-J**) cells in early mitosis and cytokinesis. Scale bar = 16 nm in zoomed images and 10  $\mu$ m in all others. Representative images from 60 control cells and 50 shYAP cells from two independent experiments.

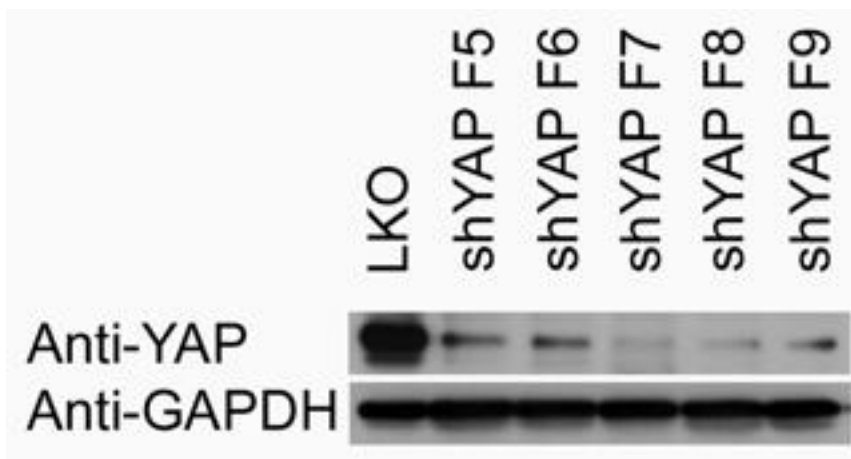

**Fig. S2**

**YAP hairpins**

Western blot showing YAP abundance in MCF-10A cells after knockdown with five different shRNA sequences. LKO is empty-vector control and GAPDH was used as loading control. Immunoblots are representative of two independent experiments.

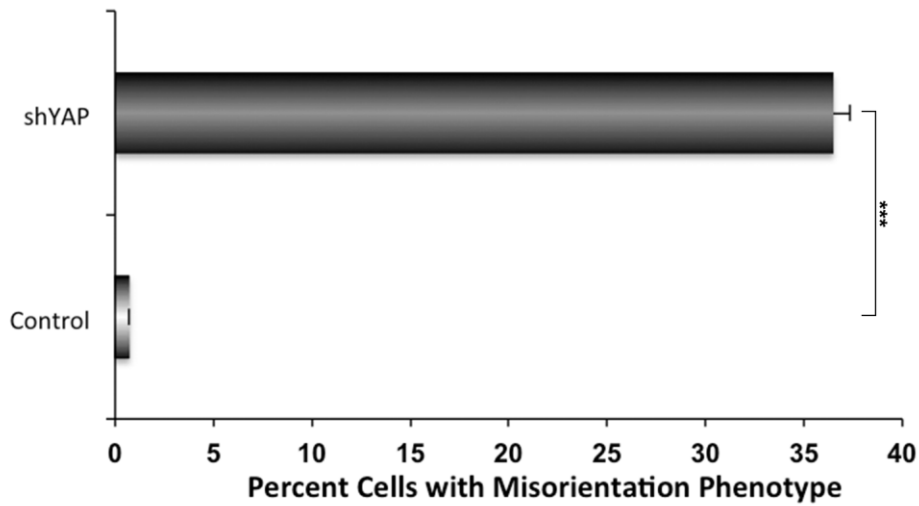

**Fig. S3**

**Spindle misorientation after YAP knockdown**

Quantification of spindle misorientation during cell division from time-lapse movies of cells after knockdown of YAP. Quantification was performed on 277 YAP knockdown cells and 2206 control cells from three independent experiments. Bars represent mean+SEM of three experiments each performed in triplicate. Statistical significance (\*\*\*) $P < 0.001$ ; \*\* $P < 0.01$ ; \* $P < 0.05$ ; NS,  $P > 0.05$ ) was assessed by unpaired Student's *t*-test versus control LKO.

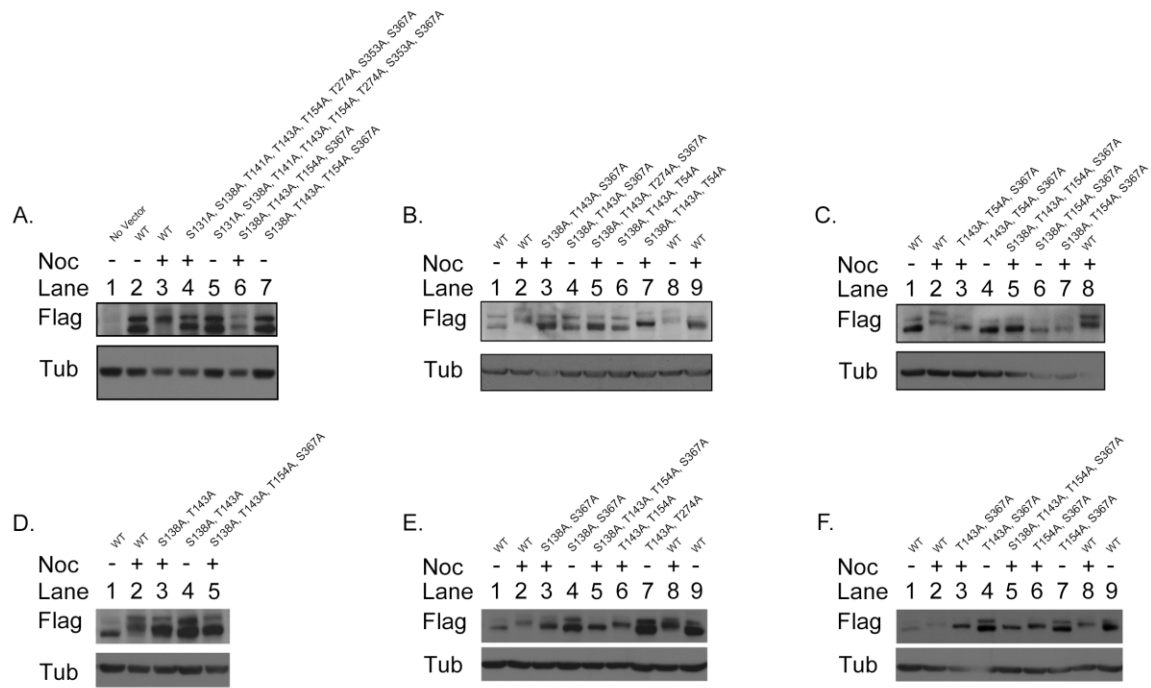

**Fig. S4**

**YAP phospho-mutant combinations**

**(A)** Anti-Flag and anti-Tubulin immunoblot of extracts from HeLa cells expressing different mutant variants of Flag-YAP in which all eight or four serine or threonine sites were mutated to alanine. Alternate lanes of the gels show cells treated with nocodazole. **(B and C)** Same as panel A except three serine or threonine sites on Flag-YAP were mutated into alanine. **(D to F)** Same as A except two serine or threonine sites were mutated to alanine. Immunoblots are representative of two independent experiments.

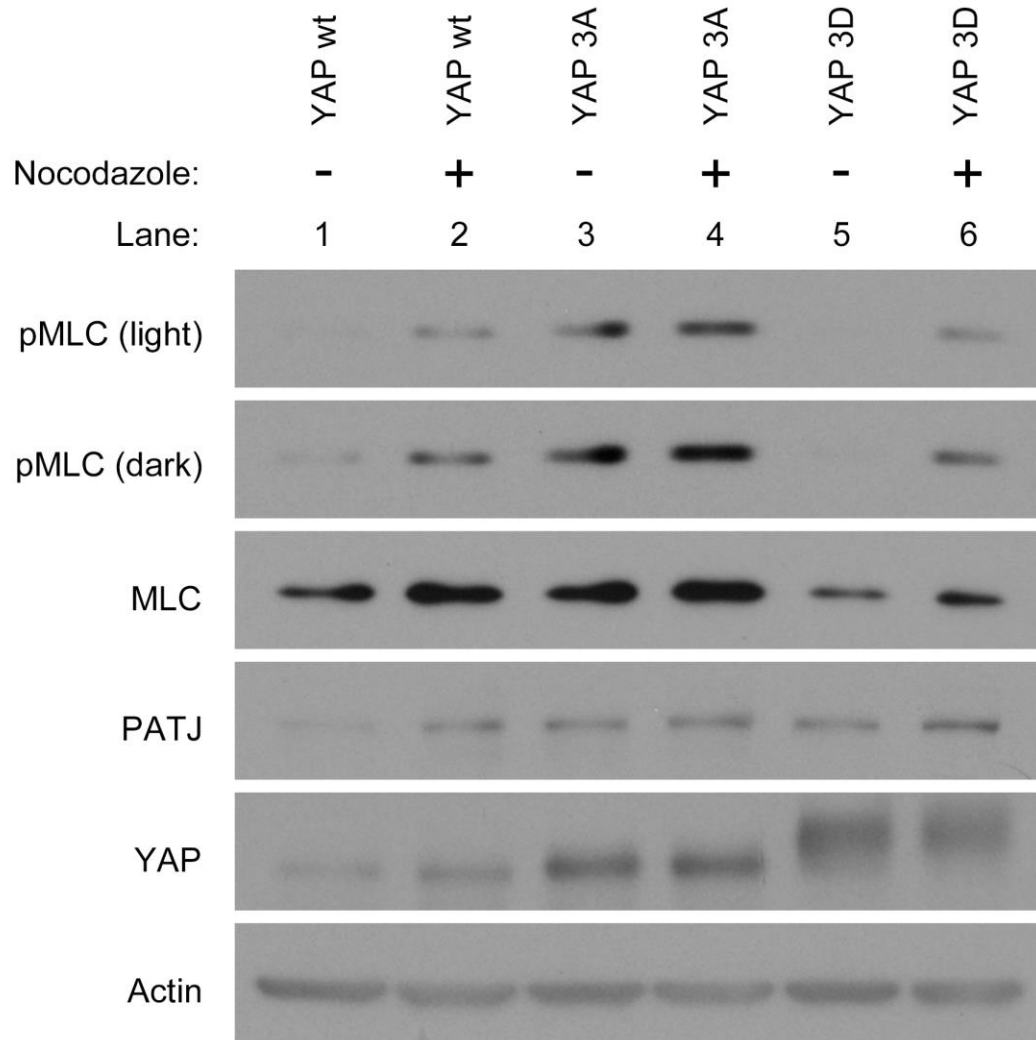

**Fig. S5**

**Phosphorylation of MLC is increased by expression of the YAP 3A mutant**

Anti-phosphoMLC immunoblot of HeLa cells expressing YAP WT, YAP 3A or 3D phosphorylation mutants and treated with or without nocodazole. Immunoblots are representative of two independent experiments.

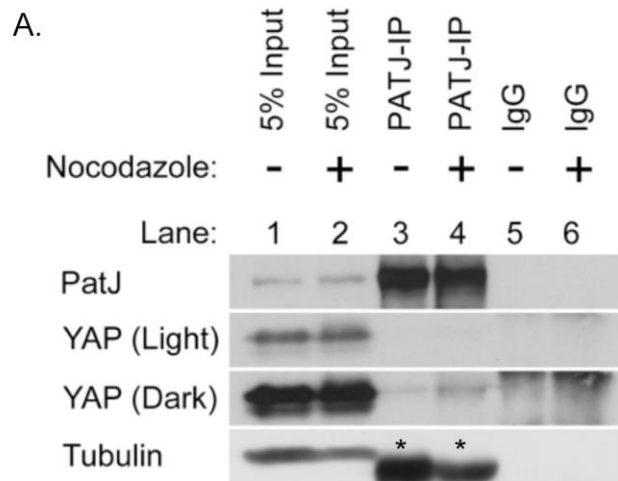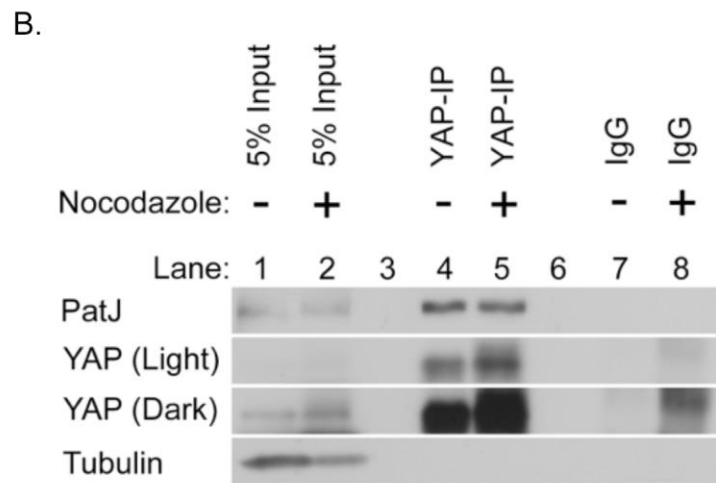

**Fig. S6**  
**YAP and PATJ coimmunoprecipitation**

**(A)** MCF-10A cell lysates were immunoprecipitated with anti-PATJ antibody and assessed for the ability of endogenous YAP to coprecipitate. Asterisk indicates IgG band in lane 3 and 4 of the immunoblot. Immunoblots are representative of three independent experiments. **(B)** MCF-10A cell lysates were immunoprecipitated with anti-YAP antibody and assessed for the ability of endogenous PATJ to coprecipitate. Immunoblots are representative of four independent experiments.



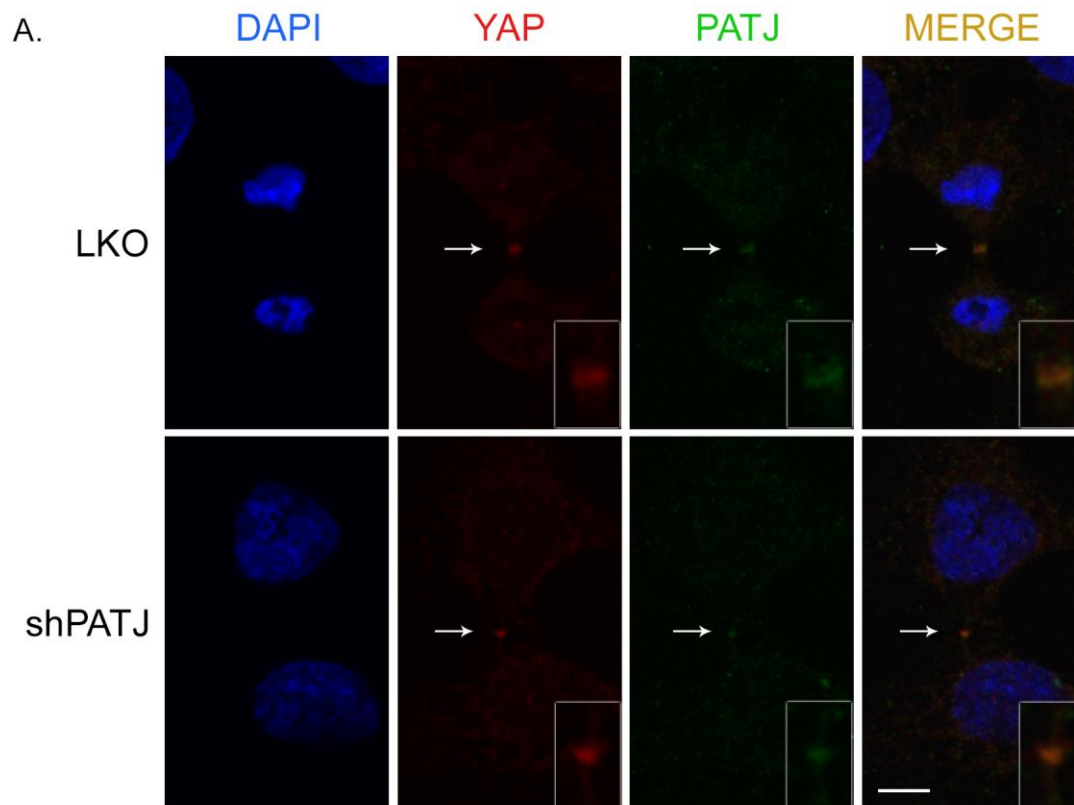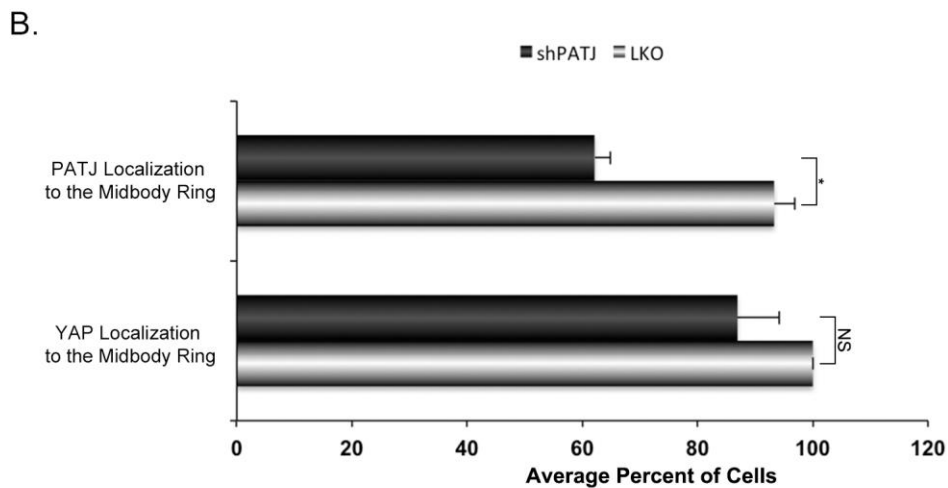

**Fig. S7**

**Immunofluorescence analysis of PATJ-depleted cells**

**A.** Representative immunofluorescence images of PATJ and YAP in control (n=44) and shYAP (n=21) cells using PATJ antibody Santa Cruz ab151257 from three independent experiments. Three different PATJ antibodies were tested: Novus Santa NBP2-19707, Santa Cruz ab151257, and Santa Cruz ab102113.

Note the co-localization of YAP and PATJ in the midbody ring and the localization of YAP to midbody in PATJ-depleted cells. **B.** Quantification of PATJ and YAP localization to the midbody in control (LKO) or shPATJ MCF-10A cells. Note the reduction in PATJ detection at the midbody in cells expressing PATJ shRNA (35% of cytokinetic figures showed dim to lightly speckled to no PATJ staining in the midbody ring area), yet no significant reduction in YAP staining. Scale bar = 2.5  $\mu\text{m}$ . Statistical significance ( $***P<0.001$ ;  $**P<0.01$ ;  $*P<0.05$ ; NS,  $P>0.05$ ) was assessed by unpaired Student's t-test. Bars represent mean+SEM from three independent experiments.

## **Table S1**

### **HCIPs for YAP wild type, YAP 3D, and YAP 3A**

MCF-10A N-TapYAP (Flag & HA-tagged at the N-terminus) wild-type, YAP 3A, or YAP 3D cells were synchronized with nocodazole and released at 0, 30, 60, 90, 120, 180 minutes. IP-MS/MS and *Comparative Proteomics Analysis Software Suite* (CompPASS) Analysis were used to assign confidence values to interacting proteins and the values were collected and normalized.

## **Movie S1**

### **Mitosis of MCF-10A cells depleted of YAP with five distinct shRNA sequences**

Representative time-lapse DIC microscopy movies of MCF-10A cells undergoing mitosis after knockdown of YAP with five distinct shRNA sequences. LKO is empty-vector control.

## **Movie S2**

### **Mitosis of YAP-depleted MCF-10A cells expressing GFP-tubulin**

Representative time-lapse movies of mitotic MCF-10A cells expressing GFP-tubulin. Control LKO vector (top) or shYAP (bottom) cells. Left panels show phase contrast and right panels show corresponding fluorescence microscopy of GFP-tubulin.

## **Movie S3**

### **Mitosis of MCF-10A cells treated with YAP siRNA**

Representative time-lapse DIC movies of MCF-10A cells undergoing mitosis after treatment with a YAP-targeted siRNA SMARTpool. An siRNA SMARTpool against Gapdh (siGapdh) was used as a control.

## **Movie S4**

### **Mitosis of YAP-depleted MCF-10A cells in a monolayer**

Representative time-lapse movies of a confluent monolayer of MCF-10A cells after knockdown of YAP showing multiple mitoses. Phase-contrast images are shown.

## **Movie S5**

### **Mitosis of YAP-depleted HeLa cells**

Representative time-lapse movies of mitotic HeLa cells expressing GFP-tubulin after knockdown of YAP. Left images are phase-contrast; right images are fluorescence microscopy of GFP-tubulin.

## **Movie S6**

### **Mitosis of YAP-depleted multiple HeLa cells**

Representative time-lapse movie of multiple HeLa cells undergoing mitosis after knockdown of YAP. Phase-contrast images are shown.

## **Movie S7**

### **RHOA localization in a mitotic YAP-depleted MCF-10A cell**

Top images: representative time-lapse movie of MCF-10A cells initiating cytokinesis after knockdown of YAP. Left images are phase-contrast, right images are fluorescence microscopy of GFP-Tubulin. Bottom panel: same cells from the time-lapse were fixed and immunostained for RHOA (red) and tubulin

(green). A 3D reconstruction of a confocal z-series is shown. Note mislocalization of Rho (red).

### **Movie S8**

#### **Mitosis of YAP-depleted MCF-10A cells treated with C3 transferase or Y-27632**

Representative time-lapse phase microscopy of MCF-10A cells undergoing mitosis after knockdown of YAP treated with the Rho inhibitor TAT-C3 transferase or the ROCK inhibitor Y-27632.

### **Movie S9**

#### **Mitosis of MCF-10A cells expressing wild-type YAP or YAP 3A or YAP 3D mutants**

Representative time-lapse phase microscopy of mitosis of control LKO or YAP-depleted MCF-10A cells expressing wild-type YAP, phospho-mutant YAP 3A, or phospho-mimetic mutant YAP 3D.

### **Movie S10**

#### **Mitosis of PATJ-depleted MCF-10A cells**

Representative time-lapse DIC microscopy movies of cells undergoing mitosis after knockdown of PATJ with two distinct shRNA sequences. LKO is empty-vector control.
